# Supplementary material
Source: MDPI journal article supplement (https://www.mdpi.com/1424-8247/16/3/374)
Supplement: s1 [file s1]

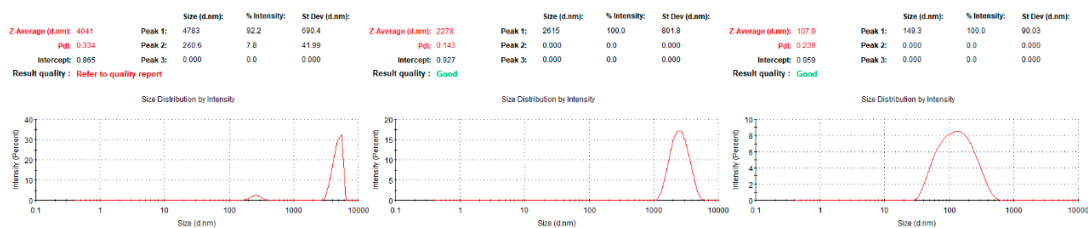

Figure S1. Hydrodynamic dimensions of FPD NMs (FA-PEG-COOH : DOX = 10 : 3, 10 : 2 and 10 : 1 from left to right)

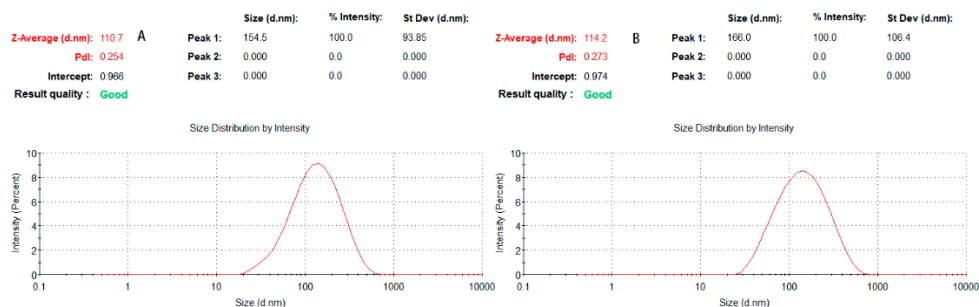

Figure S2. Stability of FPD NM. The hydrodynamic dimension after stewing 48 hours (A) and 72 hours (B) at 4°C.

Table S1. Infrared peak assignment of synthetic materials

| Materials   | Peak                       | Origins                                                                     |
|-------------|----------------------------|-----------------------------------------------------------------------------|
| FA-PEG-COOH | 1718 $\text{cm}^{-1}$      | Free carbonyl stretching vibration peak from FA and $\text{NH}_2$ -PEG-COOH |
|             | 1685 $\text{cm}^{-1}$      | Newly amide bond after reaction                                             |
|             | 1105 $\text{cm}^{-1}$      | Ether bond, C–O–C stretching vibration peak from $\text{NH}_2$ -PEG-COOH    |
|             | 2800-3000 $\text{cm}^{-1}$ | Methylene peak from $\text{NH}_2$ -PEG-COOH                                 |
| FA-PEG-DOX  | 1281 $\text{cm}^{-1}$      | vibration C-O peak of the phenol from DOX                                   |
|             | 1728 $\text{cm}^{-1}$      | Carbonyl stretching vibration peak from DOX                                 |
|             | 1681 $\text{cm}^{-1}$      | Amide bond merge peak                                                       |
|             | 2800-3000 $\text{cm}^{-1}$ | Methylene peak from $\text{NH}_2$ -PEG-COOH                                 |

Table S2.  $^1\text{H}$  NMR peak assignment of synthetic materials

| Materials   | Peak                                      | Origins                                                               |
|-------------|-------------------------------------------|-----------------------------------------------------------------------|
| FA-PEG-COOH | 3.50 ppm                                  | Methylene hydrogen peak from $\text{NH}_2$ -PEG-COOH                  |
|             | 6.5 - 9.0 ppm                             | Heterocyclic hydrogen peak of FA                                      |
| FA-PEG-DOX  | 5.82 pmm, 5.34 pmm, 5.05 pmm and 4.12 pmm | unreacted hydroxyl hydrogen or hydrogen on hydroxyl o-carbon from DOX |
|             | 3.50 ppm                                  | Methylene hydrogen peak from $\text{NH}_2$ -PEG-COOH                  |
|             | 6.5 - 9.0 ppm                             | Heterocyclic hydrogen peak from FA and newly benzene peak from DOX    |
